1 **Sites of Vulnerability on Ricin B Chain Revealed through Epitope Mapping of**  
2 **Toxin-Neutralizing Monoclonal Antibodies**

3  
4  
5  
6  
7  
8  
9  
10  
11  
12  
13  
14  
15  
16  
17  
18  
19  
20  
21  
22  
23  
24  
25  
26  
27  
28  
29  
30  
31

David J. Vance<sup>1,\*</sup>, Amanda Y. Poon<sup>2</sup>, and Nicholas J. Mantis<sup>1,2,\*</sup>

<sup>1</sup>Division of Infectious Disease, Wadsworth Center, New York State Department of Health,  
Albany, NY 12208; <sup>2</sup>Department of Biomedical Sciences, University at Albany School of Public  
Health, Albany, NY 12201

\*Correspondence: [david.vance@health.ny.gov](mailto:david.vance@health.ny.gov), [nicholas.mantis@health.ny.gov](mailto:nicholas.mantis@health.ny.gov)

32 **Abstract**

33 Ricin toxin's B subunit (RTB) is a multifunctional galactose (Gal)-/N-acetylgalactosamine  
34 (GalNAc)-specific lectin that promotes efficient uptake and intracellular trafficking of ricin's  
35 ribosome-inactivating subunit (RTA) into mammalian cells. Structurally, RTB consists of two  
36 globular domains (RTB-D1, RTB-D2), each divided into three homologous sub-domains ( $\alpha$ ,  $\beta$ ,  
37  $\gamma$ ). The two carbohydrate recognition domains (CRDs) are situated on opposite sides of RTB  
38 (sub-domains  $1\alpha$  and  $2\gamma$ ) and function non-cooperatively. Previous studies have revealed two  
39 distinct classes of toxin-neutralizing, anti-RTB monoclonal antibodies (mAbs). Type I mAbs,  
40 exemplified by SylH3, inhibit (~90%) toxin attachment to cell surfaces, while type II mAbs,  
41 epitomized by 24B11, interfere with intracellular toxin transport between the plasma membrane  
42 and the trans-Golgi network (TGN). Localizing the epitopes recognized by these two classes of  
43 mAbs has proven difficult, in part because of RTB's duplicative structure. To circumvent this  
44 problem, full-length RTB or the two individual domains, RTB-D1 and RTB-D2, were expressed  
45 as pIII fusion proteins on the surface of filamentous phage M13 and subsequently used as "bait"  
46 in mAb capture assays. The results indicated that SylH3 captured RTB-D1, while 24B11  
47 captured RTB-D2. Analysis of additional toxin-neutralizing and non-neutralizing mAbs along  
48 with single chain antibodies ( $V_{\text{H}}\text{Hs}$ ) known to compete with SylH3 or 24B11 confirmed these  
49 domain assignments. These results not only indicate that so-called type I and type II mAbs  
50 segregate on the basis of domain specificity, but suggest that RTB's two domains may contribute  
51 to distinct steps in the intoxication pathway.

52

53

54

55

## 56 **Introduction**

57           The plant toxin, ricin, is classified by military and public health officials as a biothreat  
58 agent because of its extreme potency following inhalation, coupled with the ease by which the  
59 toxin can be procured from castor beans (*Ricinus communis*) [1]. Ricin's A and B subunits each  
60 contribute to toxicity. The A subunit (RTA) is a ribosome-inactivating protein (RIP) that  
61 functions by depurination of a conserved adenine residue within the sarcin-ricin loop (SRL) of  
62 28S rRNA [2, 3]. The B subunit (RTB) is a galactose (Gal)- and N-acetylgalactosamine  
63 (GalNAc)-specific lectin capable of binding to surface exposed glycoproteins and glycolipids,  
64 including on the surface of cells in the lung [4]. Following endocytosis, RTB mediates retrograde  
65 transport of ricin to the trans-Golgi network (TGN) and the endoplasmic reticulum (ER). Within  
66 the ER, RTA is liberated from RTB and retrotranslocated across the ER membrane into the  
67 cytoplasm, where it refolds and interacts with its substrate with remarkable efficiency [5-8].

68           Structurally, RTB consists of two globular domains with identical folding topologies  
69 (**Figure 1**) [9, 10]. The two domains, RTB-D1 and RTB-D2, are each further apportioned into  
70 three homologous sub-domains ( $\alpha$ ,  $\beta$ ,  $\gamma$ ) that likely arose as a result of gene duplication of a  
71 primordial carbohydrate recognition domain (CRD) [11]. X-ray crystallography (PDB ID 2AAI)  
72 [11], site-directed mutagenesis [12-14] and phage display of RTB-D1 and RTB-D2 [15] has  
73 revealed that each domain retains functional carbohydrate recognition activity. Specifically, sub-  
74 domain 1 $\alpha$  binds Gal and is considered the “low affinity” CRD, while sub-domain 2 $\gamma$  binds Gal  
75 and GalNAc and is considered a “high affinity” CRD [12, 16-18]. Both domains contribute to cell  
76 attachment and toxin uptake [12-14].

77

### 78 **Figure 1. Structure of ricin's enzymatic (RTA) and binding (RTB) subunits.**

79 Cartoon representation of ricin holotoxin (PDB ID 2AAI) with RTA (gray) and RTB's (red) two  
80 domains (RTB-D1, RTB-D2) highlighted.

81

82           In light of its essential role in toxin uptake and trafficking, RTB is an obvious target to  
83 consider in the development of ricin countermeasures [19]. Indeed, in reports spanning more  
84 than a decade, we and others have described collections of RTB-specific monoclonal antibodies  
85 (mAbs) that have been evaluated for toxin-neutralizing activities in cell-based assays and, in

86 some cases, mouse models of ricin intoxication [20-27]. Overall, relatively few RTB-specific  
87 mAbs capable of passively protecting mice against systemic or intranasal ricin challenge have  
88 been described. However, in our collection, two stand out: SylH3 and 24B11. SylH3 is classified  
89 as a type I mAb because it is highly effective at blocking ricin attachment to cell surfaces,  
90 suggesting it neutralizes ricin by preventing ricin uptake [26-28]. 24B11, on the other hand, has  
91 little impact on attachment. Rather, it appears to neutralize ricin by interfering with intracellular  
92 trafficking between the plasma membrane and the TGN. We have classified 24B11 as a type II  
93 mAb [25].

94 Competition studies have demonstrated that 24B11 and SylH3 recognize different  
95 epitopes on RTB, although the location of those epitopes remains to be determined. 24B11's  
96 epitope was tentatively assigned to RTB-D1, based on limited reactivity with affinity-enriched  
97 phage displayed peptides [21]. SylH3's epitope was tentatively assigned to RTB-D2 by virtue of  
98 the fact that RTB's high affinity CRD is situated within subdomain 2 $\gamma$  [26-28]. The duplicative  
99 nature of RTB, structurally and functionally, has made epitope localization studies challenging.  
100 Further complicating matters has been the proven inability to express recombinant RTB in  
101 *E.coli*, necessitating the use of xenopus extracts or mammalian systems as substitutes. However,  
102 full-length RTB (FL-RTB), as well RTB-D1 and RTB-D2 constructs, have been successfully  
103 expressed as fusion proteins on the tip of filamentous phage M13 [15]. With our past expertise in  
104 phage display, we reasoned that RTB domain display might offer a highly effective means by  
105 which to localize epitopes recognized by 24B11 and SylH3, as well as other RTB-specific mAbs  
106 in our collection.

107

## 108 **Methods**

### 109 **Chemicals and biological reagents**

110 Labeled and unlabeled ricin toxin (Ricin communis agglutinin II;RCA-II) and ricin agglutinin  
111 (Ricin communis agglutinin I;RCA-I) were purchased from Vector Laboratories (Burlingame,  
112 CA, USA). Unless noted otherwise, all of the other chemicals were obtained from Sigma-  
113 Aldrich, Inc. (St. Louis, MO, USA).

## 114 **Ricin-specific mAbs and VHHs**

115 The murine mAbs were purified from hybridoma supernatants by Protein A chromatography at  
116 the Dana Farber Cancer Institute monoclonal antibody core facility (Boston, MA, USA) [24, 29].  
117 The ricin-specific, single-domain antibodies (VHH) were purified as described [30, 31].

118

## 119 **Phage display of RTB domains 1 (RTB-D1) and 2 (RTB-D2)**

120 A pET-15b plasmid encoding RTB cDNA (pRTB) was generously provided by Dr. Paul Sehnke  
121 (University of Florida). Primers were designed to amplify either full length RTB (RTB-FL) or  
122 individual domains (RTB-D1, RTB-D2) (S1 Table). We defined RTB-D1 as residues 1-135 and  
123 RTB-D2 as 136-262 (S2 Table) [11, 17]. Forward primers were designed to include a 5' NotI  
124 site, while reverse primers contained a 5' AscI site. The codon encoding cysteine at RTB  
125 position 4 (5'-TGT-3'), normally involved in disulfide bond formation with RTA, was changed  
126 to serine (5'-AGT-3') to avoid unwanted oxidation and misfolding in the RTB phage products.  
127 The RTB amplicons were cloned into the JSC phagemid (GenBank EU109715;[30, 32]) using  
128 sticky-end ligation (NotI, AscI) to encode N-terminal pIII fusion proteins. The resulting plasmids  
129 were transformed into NEB® Turbo Competent E. coli (New England Biolabs, Ipswich, MA).  
130 The Turbo Competent strain contains an amber suppressor gene for proper translation of the  
131 RTB-pIII products, as well as the F' plasmid necessary for helper phage superinfection. To  
132 produce M13 phage bearing RTB or its domains, E.coli from each transformation were infected  
133 with VCSM13 helper phage (kindly provided by Chuck Shoemaker, Tufts University).  
134 Stationary phase cultures were then subjected to centrifugation and the supernatants were treated  
135 with 20% PEG8000/2.5M NaCl to precipitate M13 phage. Resulting phage pellets were  
136 reconstituted in PBS and titered on E. coli ER2738 (New England Biolabs, Ipswich, MA).

## 137 **Competitive ELISAs**

138 The competitive ELISA protocol known as EPICC has been described [33]. Nunc Maxisorb F96  
139 microtiter plates (ThermoFisher Scientific, Pittsburgh, PA, USA) were coated overnight with  
140 capture mAb (1 µg/mL) in PBS [pH 7.4]. Plates were blocked with 2% goat serum, washed, and  
141 incubated with biotinylated-ricin, in the absence or presence of analyte mAbs (10 µg/mL). The  
142 amount of biotinylated-ricin was adjusted to achieve the EC90 of each capture antibody. After 1  
143 h, the plates were washed and developed with streptavidin-HRP antibody (1:1000;

144 SouthernBiotech, Birmingham, AL, USA) and 3,3',5,5'-tetramethylbenzidine (TMB; Kirkegaard  
145 & Perry Labs, Gaithersburg, MD, USA). The plates were analyzed with a Versamax  
146 spectrophotometer equipped with Softmax Pro 7 software (Molecular Devices, Sunnyvale, CA,  
147 USA).

148 For V<sub>H</sub>H competition assays, Nunc Maxisorb F96 microtiter plates were coated overnight  
149 with the capture mAbs (1 µg/mL). Plates were blocked with 2% goat serum, washed, and  
150 incubated with ricin (1 µg/mL) for 1 h. The plates were washed, overlaid with VHHs (330 nM;  
151 ~10 µg/mL) for 1 h, then washed again and probed with anti-E-tag-HRP secondary antibody  
152 (1:10000; Bethyl Labs, Montgomery, TX). The plates were developed with TMB, as described  
153 above for the ELISAs. To estimate the binding of the VHHs to the remaining capture mAbs, we  
154 arbitrarily set maximal ricin toxin binding (100%) as the highest OD<sub>450</sub> value observed among  
155 the panel of capture mAbs calculated as: % VHH binding = [(observed OD<sub>450</sub>)/(maximal OD<sub>450</sub>)]  
156 x 100. The values are representative of a single assay done in duplicate.

157 For M13 phage ELISAs, Nunc Maxisorb F96 microtiter plates were coated overnight  
158 with mAb or V<sub>H</sub>H (1 µg/mL in PBS). Plates were blocked with 2% bovine serum albumin (BSA)  
159 in PBS and then incubated with 5 x 10<sup>11</sup> plaque forming units (PFU) per mL in PBS (5 x 10<sup>10</sup>  
160 PFU per well) of each of the three phage constructs. The plates were washed to remove unbound  
161 phages and then probed with anti-M13-HRP secondary antibody (1:5000, Cytiva [formerly GE  
162 Healthcare], Marlboro, MA) followed by TMB as noted above.

## 163 **Statistical Analyses**

164 Statistical analyses were performed in GraphPad Prism version 8 (GraphPad Software, San Diego,  
165 CA, USA).

## 166 **Modeling of Ricin Toxin**

167 Images of ricin holotoxin (PDB ID 2AAI) were generated using PyMOL (The PyMOL Molecular  
168 Graphics System, Schrodinger LLC, San Diego, CA, USA).

169

## 170 **Results**

### 171 **Competition ELISA reveal distinct epitope clusters on RTB**

172 The relative epitope locations of the 10 RTB-specific toxin-neutralizing (underlined throughout)  
 173 and non-neutralizing mAbs in our collection are not known, because the collection as a whole  
 174 has never been subject to cross-competition assays. To address this issue, we performed  
 175 competitive sandwich ELISAs in which capture mAbs were immobilized on microtiter plates and  
 176 then probed with biotinylated ricin in the presence of molar excess competitor mAb (**Table 1**;  
 177 **Figure 2A**). The ELISAs revealed three competition groups of epitopes that we referred to as  
 178 clusters 5, 6 and 7. Clusters 1-4 have already been described on RTA [29]. Cluster 5 consisted  
 179 of SylH3 and JB4, cluster 6 consisted of 24B11, MH3, 8A1, JB11, BJF9, and LF1, and cluster 7  
 180 only LC5. 8B3 competed with both SylH3 and 24B11, tentatively situating its epitope between  
 181 clusters 5 and 6. Thus, the cross-competition ELISA defined at least three spatially distinct  
 182 epitope clusters on RTB with toxin-neutralizing mAbs.  
 183

**Table 1. Domain Assignments of RTB-specific mAbs**

| mAb <sup>a</sup> | Cluster | RTB capture |                 |                 | Competition |       | Domain Assignment <sup>c</sup> |
|------------------|---------|-------------|-----------------|-----------------|-------------|-------|--------------------------------|
|                  |         | FL          | D1 <sup>b</sup> | D2 <sup>b</sup> | SylH3       | 24B11 |                                |
| <u>SylH3</u>     | 5       | +           | ++++            | -               | Y           | N     | D1                             |
| <u>JB4</u>       | 5       | ++          | ++++            | (++++)          | Y           | N     | D1                             |
| <u>24B11</u>     | 6       | ++          | -               | ++++            | N           | Y     | D2                             |
| <u>MH3</u>       | 6       | ++          | -               | ++++            | N           | Y     | D2                             |
| <u>8A1</u>       | 6       | ++          | -               | ++++            | N           | Y     | D2                             |
| JB11             | 6       | +++         | +++             | ++++            | N           | Y     | D1 + D2                        |
| BJF9             | 6       | ++          | (++)            | ++++            | N           | Y     | D2                             |
| LF1              | 6       | +           | -               | +/-             | N           | Y     | D2                             |
| 8B3              | 5/6     | ++          | -               | -               | Y           | Y     | D1-D2                          |
| LC5              | 7       | ++          | -               | ++++            | N           | N     | D2                             |
| <u>WECB2</u>     | 1       | -           | -               | -               | n.d.        | n.d.  | RTA                            |

<sup>a</sup>, underlines indicate mAbs with toxin-neutralizing activity in the Vero cell cytotoxicity assay;  
<sup>b</sup>, parentheses (++) indicate domain capture by phage display, but epitope assignments not  
 substantiated by competition ELISAs or other data; <sup>c</sup>, “D1-D2” indicates proposed epitope at  
 the D1-D2 interface, while D1 + D2 indicates independent epitopes on each domain. Y, yes;  
 N, no; n.d., not determined

184

185

186 **Figure 2. Epitope localization of RTB-specific mAbs by competition ELISA and RTB**

187 **domain capture.** (A) RTB-specific mAbs in solution (top; columns) were mixed with

188 biotinylated ricin and then applied to microtiter plates coated with indicated capture mAbs (left;  
189 rows). The heatmap indicates inhibition (%) of ricin capture relative to value obtained in the  
190 absence of a competitor. (B) Microtiter plates were coated with indicated mAbs (x axis) and then  
191 probed with phage expressing RTB-FL (pink), RTB-D1 (sky blue), or RTB-D2 (olive). The  
192 RTA-specific mAb, WECB2, was included as a control.

193

#### 194 **Epitope localization of RTB-specific mAbs using phage-displayed RTB domains 1 and 2.**

195 While the competition ELISAs enabled us to assign the mAbs to different clusters, the relative  
196 locations of those clusters on RTB remains undefined. In previous studies, we situated 24B11's  
197 epitope on RTB-D1 and SylH3's epitope on RTB-D2, although those assignments were highly  
198 speculative [21, 24, 26, 27]. As a more definitive strategy to localize B cell epitopes on  
199 individual domains of RTB, we expressed full-length RTB (RTB-FL, residues 1-262) or the  
200 individual RTB domains, RTB-D1 (residues 1-135) and RTB-D2 (residues 136-262), as N-  
201 terminal pIII fusion proteins on the surface of phage M13 [15]. We then employed the three M13  
202 phage constructs as “bait” in capture ELISAs with the panel of 10 anti-RTB mAbs (**Table 1**).  
203 WECB2, an RTA-specific mAb, was used as a control for these ELISAs.

204 We found that all 10 RTB-specific mAbs captured M13 phage displaying RTB-FL, albeit  
205 with varying degrees of efficiency (**Figure 2B**). The panel of RTB-specific mAbs was then  
206 challenged with phage expressing RTB-D1 and RTB-D2 (**Table 1; Figure 2B**). As noted above,  
207 we have repeatedly predicted that **24B11** recognizes RTB-D1, while **SylH3** recognizes RTB-D2.  
208 However, the opposite result was observed: **SylH3** captured RTB-D1, but not RTB-D2, while  
209 24B11 captured RTB-D2, but not RTB-D1 (**Table 1; Figure 2B**). The unexpected results were  
210 not due to technical errors, as the identity of the RTB-D1 and RTB-D2 fusion proteins were  
211 confirmed through DNA sequencing (data not shown). Moreover, the capture ELISA was  
212 repeated three times with rederived phage stocks and yielded identical results. We therefore were  
213 compelled to reassign SylH3's epitope to RTB-D1 and 24B11's epitope to RTB-D2.

214 The remaining 8 RTB-specific mAbs aligned as expected relative to SylH3 and 24B11  
215 when tested for the ability to capture phage expressing RTB-D1 and RTB-D2 (**Table 1; Figure**  
216 **2B**). JB4 captured RTB-D1, while the five mAbs that compete with 24B11 by ELISA captured  
217 RTB-D2 (MH3, 8A1, JB11, BJF9, LF1) [24, 26, 27]. Thus, the domain assignments for these six  
218 mAbs that compete with either SylH3 or 24B11 were internally consistent (**Figure 2**). Based on



219 these results, epitope cluster 5 (SylH3, JB4) was localized to RTB-D1, while epitope cluster 6  
220 (24B11, MH3, 8A1, JB11, BJF9, LF1) was assigned to RTB-D2.

221 The two remaining mAbs, 8B3 (cluster 5/6) and LC5 (cluster 7), had unusual RTB  
222 capture profiles (**Figure 2B**). 8B3 captured RTB-FL but neither of the individual domains (RTB-  
223 D1, RTB-D2), suggesting it recognizes an epitope spanning the domain interface. Consistent  
224 with that model is the observation that 8B3 competes with both SylH3 and 24B11 (**Table 1**;  
225 **Figure 2A**). LC5, on the other hand, captured RTB-D2 but not RTB-D1, even though it did not  
226 compete with 24B11. These results indicate that LC5 likely recognizes an epitope on RTB-D2  
227 that is spatially distinct from 24B11. Thus, we tentatively assigned epitope cluster 7 to RTB-D2.

228 It bears noting that JB4, JB11 and BJF9 were each capable of capturing RTB-D1 and  
229 RTB-D2 independently (**Table 1**; **Figure 2B**). In the case of JB11, this finding was not  
230 unexpected, because there is evidence that it primarily recognizes a linear epitope on RTB-D2  
231 and a second degenerate epitope on RTB-D1[27]. JB4 and BJF9, however, are more perplexing.  
232 BJF9 captures RTB-D2 more effectively than RTB-D1, possibly indicating that its epitope spans  
233 the two domains with greater contact on domain 2. On the other hand, JB4 captures D1 and D2  
234 equally well even though it competes with SylH3, but not 24B11 or any other D2 mAb. We can  
235 only speculate that JB4 recognizes a second, possibly degenerate epitope on D2 and/or its  
236 primary epitope spans the D1/D2 interface. Further studies, including co-crystallization trials  
237 with ricin toxin, are underway to determine JB4's epitope with more certainty.

238

### 239 **Epitope refinement by competition with RTB-specific V<sub>H</sub>Hs**

240 To further refine and validate the B cell epitope map of RTB, we performed cross-competition  
241 studies with a panel of 12 RTB-specific V<sub>H</sub>Hs whose epitopes have been tentatively localized on  
242 RTB through bootstrapping (e.g., competition ELISAs, RCA-I reactivity) [31, 34] and in some  
243 instances X-ray crystallography (M. Rudolph, AY Poon, D. Vance and N. Mantis, *manuscript*  
244 *submitted*). For the cross-competition studies, the 12 VHHs (four with toxin-neutralizing  
245 activity) were competed with each of the 10 RTB-specific mAbs. We also included the RTA-  
246 specific mAbs SyH7 and JD4 in the panel. SyH7 recognizes a toxin-neutralizing hotspot known  
247 as supercluster 2 (SC2) at the interface between RTA and RTB-D2 [34], while JD4 recognizes an  
248 adjacent region of RTA that abuts the RTB-D1/D2 interface [29]. Two VHHs (V5H6, V5D5)  
249 competed with SylH3, seven VHHs (V5E4, V5G1, V5H2, V2C11, V2D4, V4A1, JIZ-B7)

250 competed with SyH7 and two VHHs (V5B1, V5C4) competed with 24B11. A final VHH (V5B6)  
 251 did not compete with any of the three mAbs (**Table 2; Figure 3A**).  
 252

**Table 2. V<sub>H</sub>H Domain Assignments and Competition Profiles**

| V <sub>H</sub> H <sup>a</sup> | Cluster | RTB capture |    |     | Competition |       |      | Domain Assignment <sup>b</sup> |
|-------------------------------|---------|-------------|----|-----|-------------|-------|------|--------------------------------|
|                               |         | FL          | D1 | D2  | SyH3        | 24B11 | SyH7 |                                |
| V5D5                          | 5       | -           | +  | -   | +++         | -     | -    | D1                             |
| V5B6                          | 5/6     | -           | +  | -   | -           | -     | -    | D1                             |
| V5H6                          | 5/6     | -           | -  | -   | +++         | -     | -    | D1-D2                          |
| <u>V5E4</u>                   | 6       | +           | -  | +++ | -           | -     | ++   | D2                             |
| <u>V5G1</u>                   | 6       | +           | -  | +++ | -           | -     | +++  | D2                             |
| V5H2                          | 6       | +           | -  | +++ | -           | -     | +++  | D2                             |
| <u>V2C11</u>                  | 6       | +           | -  | +++ | -           | -     | +++  | D2                             |
| V2D4                          | 6       | -           | -  | ++  | -           | -     | +++  | D2                             |
| V4A1                          | 6       | -           | -  | ++  | -           | -     | +++  | D2                             |
| <u>JIZ-B7</u>                 | 6/7     | -           | -  | ++  | -           | -     | +++  | D2                             |
| V5B1                          | 6/7     | -           | +  | -   | -           | ++    | -    | D1                             |
| V5C4                          | 6/7     | +           | -  | -   | -           | ++    | -    | D1-D2                          |
| <u>V5C1</u>                   | 2       | -           | -  | -   | -           | -     | +++  | RTA                            |

<sup>a</sup>, underlines indicate V<sub>H</sub>Hs shown to protect Vero cells from ricin toxin, as reported previously [31]. <sup>b</sup>, “D1-D2” indicates proposed epitope at the D1-D2 interface.

253  
 254 **Figure 3. Epitope localization by competition with RTB-specific V<sub>H</sub>Hs.**  
 255 (A) Microtiter plates were coated with RTB-specific mAbs (top; columns) and then saturated  
 256 with ricin holotoxin before being probed with indicated V<sub>H</sub>Hs carrying E-tags (left; rows).  
 257 Bound VHHs were detected with an anti-E-tag-HRP secondary antibody, as described in the  
 258 Methods. (B) Plate-bound V<sub>H</sub>Hs were probed with M13 phage expressing RTB-FL (pink), RTB-  
 259 D1 (sky blue), or RTB-D2 (olive).

260  
 261 In an effort to further validate these assignments, the VHHs were assessed for the ability  
 262 to capture phage-displayed RTB-D1 and RTB-D2. Indeed, as predicted, the seven VHHs (V5E4,  
 263 V5G1, V5H2, V2C11, V2D4, V4A1, JIZ-B7) that competed with SyH7 captured RTB-D2  
 264 (**Table 2; Figure 3B**). V5D5 captured RTB-D1, a result consistent with its competition with  
 265 SyH3. The RTB capture assays were less conclusive for the remaining four V<sub>H</sub>Hs, V5B6,

266 V5H6, V5B1, and V5C4. Nonetheless, the results are consistent with there being three spatially  
267 distinct neutralizing hotspots on RTB: one on RTB-D1 defined by SylH3 (cluster 5) and two on  
268 RTB-D2, defined by 24B11 (cluster 6) and the RTA-specific mAb, SyH7 (SCII).

269

### 270 **A revised B cell epitope map of RTB**

271 With the information afforded by the RTB-D1/2 capture ELISAs, antibody competition assays  
272 and previously reported differential antibody reactivity with RCA-I, we revised our previous B  
273 cell epitope map of RTB [24]. For starters, the previous assignment of 24B11's epitope to RTB-  
274 D1 and SylH3's epitope to RTB-D2 is incorrect [21, 24, 26, 27]. We can now confidently assign  
275 SylH3's epitope to RTB-D1 and 24B11's epitope to RTB-D2 (**Table 1; Figure 4; S1 Text**).

276

### 277 **Figure 4. A Revised B cell epitope map of RTB.**

278 (Top) Surface representation of ricin holotoxin (PDB ID 2AAI) with color coded patches  
279 corresponding to proposed location of mAb epitopes. The epitopes recognized by SyH7 and JD4  
280 on RTA were mapped in a previous study by hydrogen exchange mass spectrometry [29].

281 (Bottom) Linear depiction of RTB's subdomains with horizontal lines below indicating proposed  
282 mAb epitope locations. The mAbs are color coded with their respective epitopes shown on the  
283 PyMol image above. RTB's two CRDs are located in subdomains 1 $\alpha$  and 2 $\gamma$  and highlighted  
284 ("lactose").

285

286 Within RTB-D1, SylH3's epitope can be further positioned within subdomain 1 $\beta$ -1 $\gamma$   
287 (residues 65-105), based on competition ELISAs and differential reactivity with RCA-I (**S1**  
288 **Text**; [24, 27]. By all accounts, JB4's epitope is indistinguishable from SylH3's epitope, even  
289 though the two mAbs have different VH and VL CDR1-3 sequences [35]. We conclude therefore  
290 that SylH3 and JB4's epitopes collectively define a toxin-neutralizing hotspot on RTB-D1. This  
291 region of RTB-D1 is being further interrogated with a collection of recently identified toxin-  
292 neutralizing and non-neutralizing V<sub>H</sub>Hs (A. Poon, D. Vance, and N. Mantis, unpublished  
293 results). It remains to be determined whether there are additional targets of vulnerability on  
294 RTB-D1.

295 Within RTB-D2, 24B11's epitope is proposed to reside within subdomain 2 $\beta$ . This  
296 conclusion is based on RTB-D1/D2 phage display and competition ELISAs (**S1 Text**). As shown

297 in **Figure 4**, subdomain 2 $\beta$  (residues 178-221) is situated on the underside of RTB and slightly  
298 distant from ricin's second Gal/GalNAc pocket in subdomain 2 $\gamma$ . While there are other RTB-  
299 specific mAbs in our collection that compete with 24B11, including two (MH3, 8A1) with IC<sub>50</sub>  
300 values similar to 24B11 (<5 nM), two (8B3, LF1) with substantially less potent toxin-  
301 neutralizing activity (~30 nM IC<sub>50</sub>) and two (JB11, BJF9) with no notable activity, the V<sub>H</sub>H  
302 competition profiles shown in **Figure 3** demonstrate that 24B11's epitope is distinct. In fact, the  
303 V<sub>H</sub>H competition profiles with mAbs MH3, 8A1, BJF9, LF1 and JB11 suggest their epitopes are  
304 juxtaposed and possibly overlapping with subdomain 2 $\gamma$  (**Figure 4**). In total, our results suggest  
305 that within RTB-D2 there is either a toxin-neutralizing “belt” stretching from subdomains 2 $\beta$ -2 $\gamma$   
306 or two hotspots separated by a trough.

307

## 308 **Discussion**

309 The structurally duplicative and functionally redundant nature of RTB has made B cell epitope  
310 identification difficult. In the current study, our ability to successfully express RTB's two  
311 individual domains (RTB-D1, RTB-D2) as fusion proteins on the surface of M13 enabled us to  
312 localize with confidence SylH3's epitope to RTB-D1 and 24B11's epitope to RTB-D2. These  
313 domain assignments are further buttressed by competition assays with mAbs and V<sub>H</sub>Hs whose  
314 epitopes on ricin holotoxin have been resolved by HX-MS and/or X-ray crystallography (M.  
315 Rudolph, AY Poon, D. Vance and N. Mantis, *manuscript submitted*)[29, 31]

316 With the former epitope assignments of SylH3 and 24B11 upended, it is necessary to  
317 revisit previous interpretations about mechanisms of toxin-neutralization and the Type I and  
318 Type II labels. For example, based on SylH3's ability to inhibit ricin attachment to a variety of  
319 primary cell types, including murine alveolar macrophages, bone marrow-derived macrophages,  
320 and Kupffer cells, we classified it as Type I and reasoned that it must target an epitope in  
321 proximity to the high affinity CRD in RTB subdomain 2 $\gamma$  [26, 36, 37]. However, the results  
322 presented herein indicate that SylH3's epitope is situated on RTB-D1, and, specifically within  
323 subdomain 1 $\beta$ . This supposition is substantiated by an X-ray crystal structure of SylH3 Fab  
324 fragments in complex with ricin holotoxin (M. Rudolph, D. Vance and N. Mantis, *manuscript in*  
325 *preparation*). Unfortunately, by positioning SylH3's epitope outside RTB's two galactoside-  
326 specific CRD elements, it is difficult to envision how SylH3 interferes with ricin attachment  
327 without invoking a possible role for allostery [38]. Even if SylH3 were to occlude access to CRD

328  $1\alpha$ , there are numerous studies in the literature demonstrating that  $2\gamma$  alone is proficient in  
329 promoting ricin entry into cells via lactose-dependent and -independent pathways [12-14]. The  
330 suggestion that there is a cryptic CRD in subdomain  $1\beta$  is not entirely dismissible [39], but, at  
331 best, it contributes only a small fraction to cell attachment and even fully obstructing this  
332 element would not account for SylH3's toxin-neutralizing activity. Irrespective of the mechanism  
333 of SylH3 action, the mAb has proven to have value prophylactically and therapeutically alone  
334 and when combined with an RTA-specific mAb, PB10, and used in mouse models of pulmonary  
335 ricin intoxication [37, 40].

336 24B11 is representative of the type II class of RTB-specific mAbs, defined by robust  
337 toxin-neutralizing activity that is not attributable to effects on inhibition of toxin attachment.  
338 Rather, 24B11 IgG and Fab fragments, when bound to ricin on the cell surface, interrupt toxin  
339 trafficking from the plasma membrane to the TGN by shunting the complex for lysosomal  
340 degradation [25]. Based on tentative linear epitope mapping studies, we have been working  
341 under the assumption that 24B11 recognizes an epitope in proximity to CRD  $1\alpha$  [21]. However,  
342 reassignment of 24B11's epitope to RTB-D2 is actually more consistent its functional profile.  
343 Specifically, mAbs (e.g., SyH7) and V<sub>H</sub>Hs (e.g., V5E4, V2C11) that bind at the interface of RTA  
344 and RTB's subdomain  $2\gamma$  (so-called "SC2") affect ricin retrograde trafficking in Vero and HeLa  
345 cells (M. Rudolph, A. Poon, D. Vance, N. Mantis, *manuscript submitted*) [41]. Our results  
346 position 24B11's epitope just outside of SC2, which is defined operatively as competition with  
347 SyH7 [34]. Collectively, these results suggest that RTB subdomain  $2\gamma$  and neighboring elements  
348 are involved in sorting ricin within early endosomes, possibly by interacting with one or more  
349 host factors [42]. In conclusion, we have localized sites of vulnerability on RTB-D1 that appear  
350 to be primarily involved in toxin attachment to host cells, and on RTB-D2 (and spilling over onto  
351 RTA) that apparently function in intracellular trafficking.

352

### 353 **Acknowledgements**

354 We gratefully acknowledge the Wadsworth Center's Media and Tissue Culture core facility for  
355 bacterial media and the Applied Genomic Technologies Core for DNA sequencing services. We  
356 thank Elizabeth Cavosie (Wadsworth Center) for administrative assistance and Dr. Michael  
357 Rudolph (New York Structural Biology Center) for helpful discussions and for sharing  
358 preliminary findings.

359

## 360 **References**

- 361 1. Cieslak TJ, Kortepeter MG, Wojtyk RJ, Jansen HJ, Reyes RA, Smith JO, et al. Beyond the  
362 Dirty Dozen: A Proposed Methodology for Assessing Future Bioweapon Threats. *Mil Med.*  
363 2018;183(1-2):e59-e65. doi: 10.1093/milmed/usx004. PubMed PMID: 29401327.
- 364 2. Endo Y, Mitsui K, Motizuki M, Tsurugi K. The mechanism of action of ricin and related toxic  
365 lectins on eukaryotic ribosomes. The site and the characteristics of the modification in 28 S  
366 ribosomal RNA caused by the toxins. *J Biol Chem.* 1987;262(12):5908-12. PubMed PMID:  
367 3571242.
- 368 3. Endo Y, Tsurugi K. RNA N-glycosidase activity of ricin A-chain. Mechanism of action of the  
369 toxic lectin ricin on eukaryotic ribosomes. *J Biol Chem.* 1987;262(17):8128-30. Epub  
370 1987/06/15. PubMed PMID: 3036799.
- 371 4. Sapoznikov A, Falach R, Mazor O, Alcalay R, Gal Y, Seliger N, et al. Diverse profiles of ricin-  
372 cell interactions in the lung following intranasal exposure to ricin. *Toxins (Basel).*  
373 2015;7(11):4817-31. doi: 10.3390/toxins7114817. PubMed PMID: 26593946; PubMed Central  
374 PMCID: PMC4663535.
- 375 5. Argent RH, Parrott AM, Day PJ, Roberts LM, Stockley PG, Lord JM, et al. Ribosome-  
376 mediated folding of partially unfolded ricin A-chain. *J Biol Chem.* 2000;275(13):9263-9.  
377 PubMed PMID: 10734065.
- 378 6. Li S, Spooner RA, Allen SC, Guise CP, Ladds G, Schnoder T, et al. Folding-competent and  
379 folding-defective forms of ricin A chain have different fates after retrotranslocation from the  
380 endoplasmic reticulum. *Mol Biol Cell.* 2010;21(15):2543-54. Epub 2010/06/04. doi: E09-08-  
381 0743 [pii]  
382 10.1091/mbc.E09-08-0743. PubMed PMID: 20519439; PubMed Central PMCID: PMC2912342.
- 383 7. Spooner RA, Hart PJ, Cook JP, Pietroni P, Rogon C, Hohfeld J, et al. Cytosolic chaperones  
384 influence the fate of a toxin dislocated from the endoplasmic reticulum. *Proc Natl Acad Sci U*  
385 *S A.* 2008;105(45):17408-13. Epub 2008/11/08. doi: 0809013105 [pii]  
386 10.1073/pnas.0809013105. PubMed PMID: 18988734; PubMed Central PMCID: PMC2580750.
- 387 8. Spooner RA, Lord JM. How Ricin and Shiga Toxin Reach the Cytosol of Target Cells:  
388 Retrotranslocation from the Endoplasmic Reticulum. *Curr Top Microbiol Immunol.*  
389 2012;357:19-40. Epub 2011/07/16. doi: 10.1007/82\_2011\_154. PubMed PMID: 21761287.

- 390 9. Lord JM, Roberts LM, Robertus JD. Ricin: structure, mode of action, and some current  
391 applications. *Faseb J.* 1994;8(2):201-8. PubMed PMID: 8119491.
- 392 10. Montfort W, Villafranca JE, Monzingo AF, Ernst SR, Katzin B, Rutenber E, et al. The  
393 three-dimensional structure of ricin at 2.8 Å. *Journal of Biological Chemistry.*  
394 1987;262(11):5398-403.
- 395 11. Rutenber E, Ready M, Robertus JD. Structure and evolution of ricin B chain. *Nature.*  
396 1987;326(6113):624-6. Epub 1987/04/09. doi: 10.1038/326624a0. PubMed PMID: 3561502.
- 397 12. Newton DL, Wales R, Richardson PT, Walbridge S, Saxena SK, Ackerman EJ, et al. Cell  
398 surface and intracellular functions for ricin galactose binding. *J Biol Chem.*  
399 1992;267(17):11917-22. PubMed PMID: 1601861.
- 400 13. Sphyris N, Lord JM, Wales R, Roberts LM. Mutational analysis of the Ricinus lectin B-  
401 chains. Galactose-binding ability of the 2 gamma subdomain of Ricinus communis agglutinin  
402 B-chain. *J Biol Chem.* 1995;270(35):20292-7. PubMed PMID: 7657599.
- 403 14. Wales R, Richardson PT, Roberts LM, Woodland HR, Lord JM. Mutational analysis of  
404 the galactose binding ability of recombinant ricin B chain. *J Biol Chem.* 1991;266(29):19172-  
405 9. PubMed PMID: 1717462.
- 406 15. Swimmer C, Lehar SM, McCafferty J, Chiswell DJ, Blattler WA, Guild BC. Phage  
407 display of ricin B chain and its single binding domains: system for screening galactose-binding  
408 mutants. *Proc Natl Acad Sci U S A.* 1992;89(9):3756-60. Epub 1992/05/01. doi:  
409 10.1073/pnas.89.9.3756. PubMed PMID: 1373889; PubMed Central PMCID:  
410 PMC525569.
- 411 16. Baenziger JU, Fiete D. Structural determinants of Ricinus communis agglutinin and toxin  
412 specificity for oligosaccharides. *J Biol Chem.* 1979;254(19):9795-9. PubMed PMID: 489569.
- 413 17. Rutenber E, Katzin BJ, Ernst S, Collins EJ, Mlsna D, Ready MP, et al. Crystallographic  
414 refinement of ricin to 2.5 Å. *Proteins.* 1991;10(3):240-50. doi: 10.1002/prot.340100308.  
415 PubMed PMID: 1881880.
- 416 18. Zentz C, Frenoy JP, Bourrillon R. Binding of galactose and lactose to ricin. Equilibrium  
417 studies. *Biochim Biophys Acta.* 1978;536(1):18-26. PubMed PMID: 708758.
- 418 19. Gal Y, Mazor O, Falach R, Sapoznikov A, Kronman C, Sabo T. Treatments for  
419 Pulmonary Ricin Intoxication: Current Aspects and Future Prospects. *Toxins (Basel).*

- 420 2017;9(10). doi: 10.3390/toxins9100311. PubMed PMID: 28972558; PubMed Central PMCID:  
421 PMCPMC5666358.
- 422 20. Maddaloni M, Cooke C, Wilkinson R, Stout AV, Eng L, Pincus SH. Immunological  
423 characteristics associated with the protective efficacy of antibodies to ricin. *J Immunol.*  
424 2004;172(10):6221-8. PubMed PMID: 15128810.
- 425 21. McGuinness CR, Mantis NJ. Characterization of a novel high-affinity monoclonal  
426 immunoglobulin G antibody against the ricin B subunit. *Infect Immun.* 2006;74(6):3463-70.  
427 Epub 2006/05/23. doi: 10.1128/IAI.00324-06. PubMed PMID: 16714577; PubMed Central  
428 PMCID: PMCPMC1479246.
- 429 22. Noy-Porat T, Rosenfeld R, Ariel N, Epstein E, Alcalay R, Zvi A, et al. Isolation of Anti-  
430 Ricin Protective Antibodies Exhibiting High Affinity from Immunized Non-Human Primates.  
431 *Toxins (Basel).* 2016;8(3). doi: 10.3390/toxins8030064. PubMed PMID: 26950154; PubMed  
432 Central PMCID: PMCPMC4810209.
- 433 23. Prigent J, Panigai L, Lamourette P, Sauvaire D, Devilliers K, Plaisance M, et al.  
434 Neutralising antibodies against ricin toxin. *PLoS One.* 2011;6(5):e20166. Epub 2011/06/03.  
435 doi: 10.1371/journal.pone.0020166  
436 PONE-D-11-01765 [pii]. PubMed PMID: 21633505; PubMed Central PMCID: PMC3102095.
- 437 24. Rong Y, Van Slyke G, Vance DJ, Westfall J, Ehrbar D, Mantis NJ. Spatial location of  
438 neutralizing and non-neutralizing B cell epitopes on domain 1 of ricin toxin's binding subunit.  
439 *PLoS One.* 2017;12(7):e0180999. Epub 2017/07/13. doi: 10.1371/journal.pone.0180999.  
440 PubMed PMID: 28700745; PubMed Central PMCID: PMCPMC5507285.
- 441 25. Yermakova A, Klokk TI, Cole R, Sandvig K, Mantis NJ. Antibody-mediated inhibition  
442 of ricin toxin retrograde transport. *MBio.* 2014;5(2):e00995. Epub 2014/04/10. doi:  
443 10.1128/mBio.00995-13. PubMed PMID: 24713323; PubMed Central PMCID:  
444 PMCPMC3993858.
- 445 26. Yermakova A, Mantis NJ. Protective immunity to ricin toxin conferred by antibodies  
446 against the toxin's binding subunit (RTB). *Vaccine.* 2011;29(45):7925-35. Epub 2011/08/30.  
447 doi: S0264-410X(11)01334-X [pii]  
448 10.1016/j.vaccine.2011.08.075. PubMed PMID: 21872634.



- 449 27. Yermakova A, Vance DJ, Mantis NJ. Sub-Domains of Ricin's B Subunit as Targets of  
450 Toxin Neutralizing and Non-Neutralizing Monoclonal Antibodies. PLoS One.  
451 2012;7(9):e44317. Epub 2012/09/18. doi: 10.1371/journal.pone.0044317  
452 PONE-D-12-14070 [pii]. PubMed PMID: 22984492; PubMed Central PMCID: PMC3439471.
- 453 28. Yermakova A, Mantis NJ. Neutralizing activity and protective immunity to ricin toxin  
454 conferred by B subunit (RTB)-specific Fab fragments. Toxicon. 2013;72:29-34. Epub  
455 2013/04/23. doi: S0041-0101(13)00135-9 [pii]  
456 10.1016/j.toxicon.2013.04.005. PubMed PMID: 23603317.
- 457 29. Toth RTI, Angalakurthi SK, Van Slyke G, Vance DJ, Hickey JM, Joshi SB, et al. High-  
458 Definition Mapping of Four Spatially Distinct Neutralizing Epitope Clusters on RiVax, a  
459 Candidate Ricin Toxin Subunit Vaccine. Clin Vaccine Immunol. 2017;24(12). Epub  
460 2017/10/20. doi: 10.1128/CVI.00237-17. PubMed PMID: 29046307; PubMed Central PMCID:  
461 PMC5717194.
- 462 30. Vance DJ, Tremblay JM, Mantis NJ, Shoemaker CB. Stepwise engineering of  
463 heterodimeric single domain camelid VHH antibodies that passively protect mice from ricin  
464 toxin. J Biol Chem. 2013;288(51):36538-47. Epub 2013/11/10. doi: 10.1074/jbc.M113.519207.  
465 PubMed PMID: 24202178; PubMed Central PMCID: PMC3868766.
- 466 31. Vance DJ, Tremblay JM, Rong Y, Angalakurthi SK, Volkin DB, Middaugh CR, et al.  
467 High-Resolution Epitope Positioning of a Large Collection of Neutralizing and  
468 Nonneutralizing Single-Domain Antibodies on the Enzymatic and Binding Subunits of Ricin  
469 Toxin. Clin Vaccine Immunol. 2017;24(12). Epub 2017/10/13. doi: 10.1128/CVI.00236-17.  
470 PubMed PMID: 29021300; PubMed Central PMCID: PMC5717184.
- 471 32. Sepulveda J, Shoemaker CB. Design and testing of PCR primers for the construction of  
472 scFv libraries representing the immunoglobulin repertoire of rats. J Immunol Methods.  
473 2008;332(1-2):92-102. Epub 2008/02/05. doi: 10.1016/j.jim.2007.12.014. PubMed PMID:  
474 18242637; PubMed Central PMCID: PMC2362146.
- 475 33. Van Slyke G, Ehrbar DJ, Doering J, Yates JL, S.Vitetta E, Donini O, et al. Endpoint and  
476 Epitope-specific Antibody Responses as Correlates of Vaccine-mediated Protection of Mice  
477 against Ricin Toxin. bioRxiv. 2020:2020.05.06.081174. doi: 10.1101/2020.05.06.081174.
- 478 34. Poon AY, Vance DJ, Rong Y, Ehrbar D, Mantis NJ. A Supercluster of Neutralizing  
479 Epitopes at the Interface of Ricin's Enzymatic (RTA) and Binding (RTB) Subunits. Toxins

- 480 (Basel). 2017;9(12). Epub 2017/11/24. doi: 10.3390/toxins9120378. PubMed PMID:  
481 29168727; PubMed Central PMCID: PMCPMC5744098.
- 482 35. Sully EK, Whaley KJ, Bohorova N, Bohorov O, Goodman C, Kim DH, et al. Chimeric  
483 plantibody passively protects mice against aerosolized ricin challenge. *Clin Vaccine Immunol.*  
484 2014;21(5):777-82. Epub 2014/02/28. doi: 10.1128/cvi.00003-14. PubMed PMID: 24574537;  
485 PubMed Central PMCID: PMCPMC4018890.
- 486 36. Mooney B, Torres-Velez FJ, Doering J, Ehrbar DJ, Mantis NJ. Sensitivity of Kupffer  
487 cells and liver sinusoidal endothelial cells to ricin toxin and ricin toxin-Ab complexes. *J*  
488 *Leukoc Biol.* 2019;106(5):1161-76. Epub 2019/07/18. doi: 10.1002/JLB.4A0419-123R.  
489 PubMed PMID: 31313388; PubMed Central PMCID: PMCPMC7008010.
- 490 37. Rong Y, Torres-Velez FJ, Ehrbar D, Doering J, Song R, Mantis NJ. An intranasally  
491 administered monoclonal antibody cocktail abrogates ricin toxin-induced pulmonary tissue  
492 damage and inflammation. *Hum Vaccin Immunother.* 2019:1-15. Epub 2019/10/08. doi:  
493 10.1080/21645515.2019.1664243. PubMed PMID: 31589555.
- 494 38. Yao J, Nellas RB, Glover MM, Shen T. Stability and Sugar Recognition Ability of Ricin-  
495 like Carbohydrate Binding Domains. *Biochemistry.* 2011. Epub 2011/04/23. doi:  
496 10.1021/bi102021p. PubMed PMID: 21510689.
- 497 39. Fu T, Burbage C, Tagge E, Chandler J, Willingham M, Frankel A. Double-lectin site  
498 ricin B chain mutants expressed in insect cells have residual galactose binding: evidence for  
499 more than two lectin sites on the ricin toxin B chain. *Bioconjug Chem.* 1996;7(6):651-8. Epub  
500 1996/11/01. doi: 10.1021/bc960056b. PubMed PMID: 8950484.
- 501 40. Rong Y, Pauly M, Guthals A, Pham H, Ehrbar D, Zeitlin L, et al. A Humanized  
502 Monoclonal Antibody Cocktail to Prevent Pulmonary Ricin Intoxication. *Toxins (Basel).*  
503 2020;12(4). Epub 2020/04/03. doi: 10.3390/toxins12040215. PubMed PMID: 32235318.
- 504 41. Yermakova A, Klock TI, O'Hara JM, Cole R, Sandvig K, Mantis NJ. Neutralizing  
505 Monoclonal Antibodies against Disparate Epitopes on Ricin Toxin's Enzymatic Subunit  
506 Interfere with Intracellular Toxin Transport. *Sci Rep.* 2016;6:22721. doi: 10.1038/srep22721.  
507 PubMed PMID: 26949061; PubMed Central PMCID: PMCPMC4779987.
- 508 42. Sowa-Rogozinska N, Sominka H, Nowakowska-Golacka J, Sandvig K, Slominska-  
509 Wojewodzka M. Intracellular Transport and Cytotoxicity of the Protein Toxin Ricin. *Toxins*

510 (Basel). 2019;11(6). Epub 2019/06/21. doi: 10.3390/toxins11060350. PubMed PMID:  
511 31216687.

512

513

514

515

516 **Supporting Information**

517

518 **S1 Text. Details associated with epitope assignments on RTB.**

519

520 **S1 Table. PCR primers used in this study.**

521

522 **S2 Table. Primers used for amplification of RTB domain**

523

524

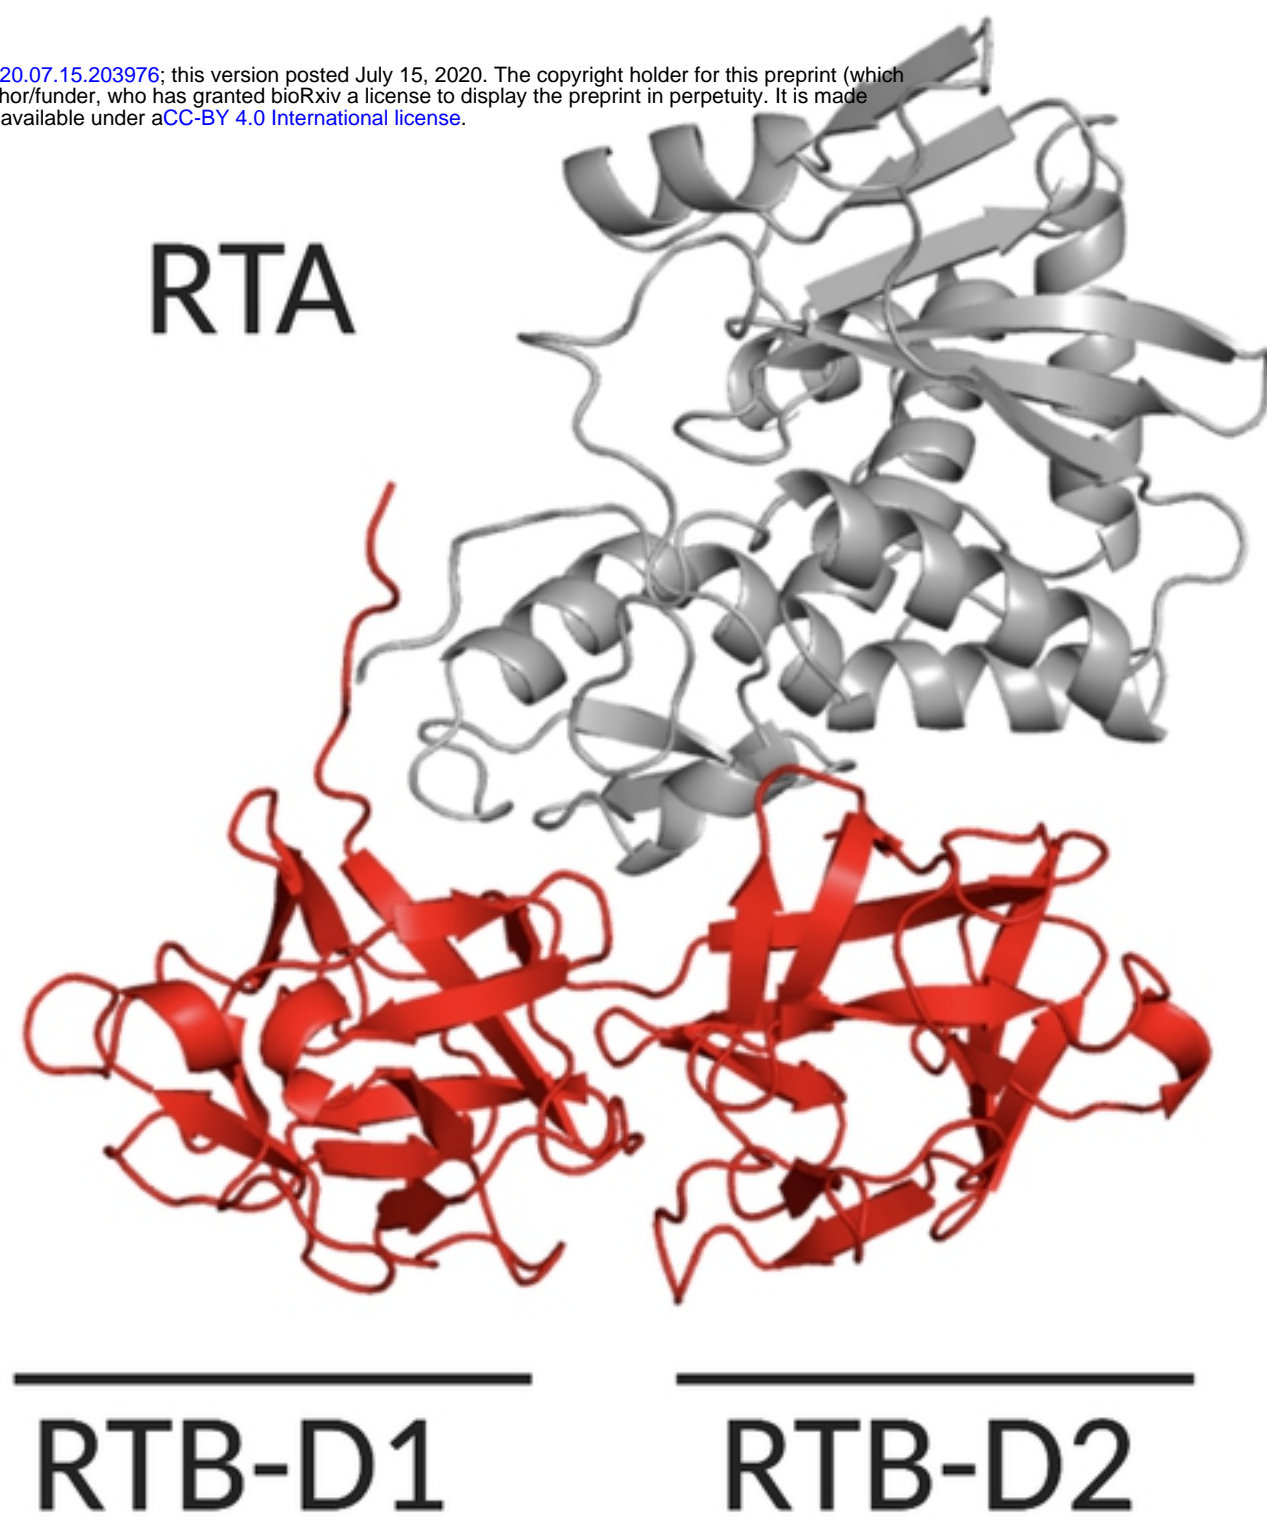

# A. Competitor mAb

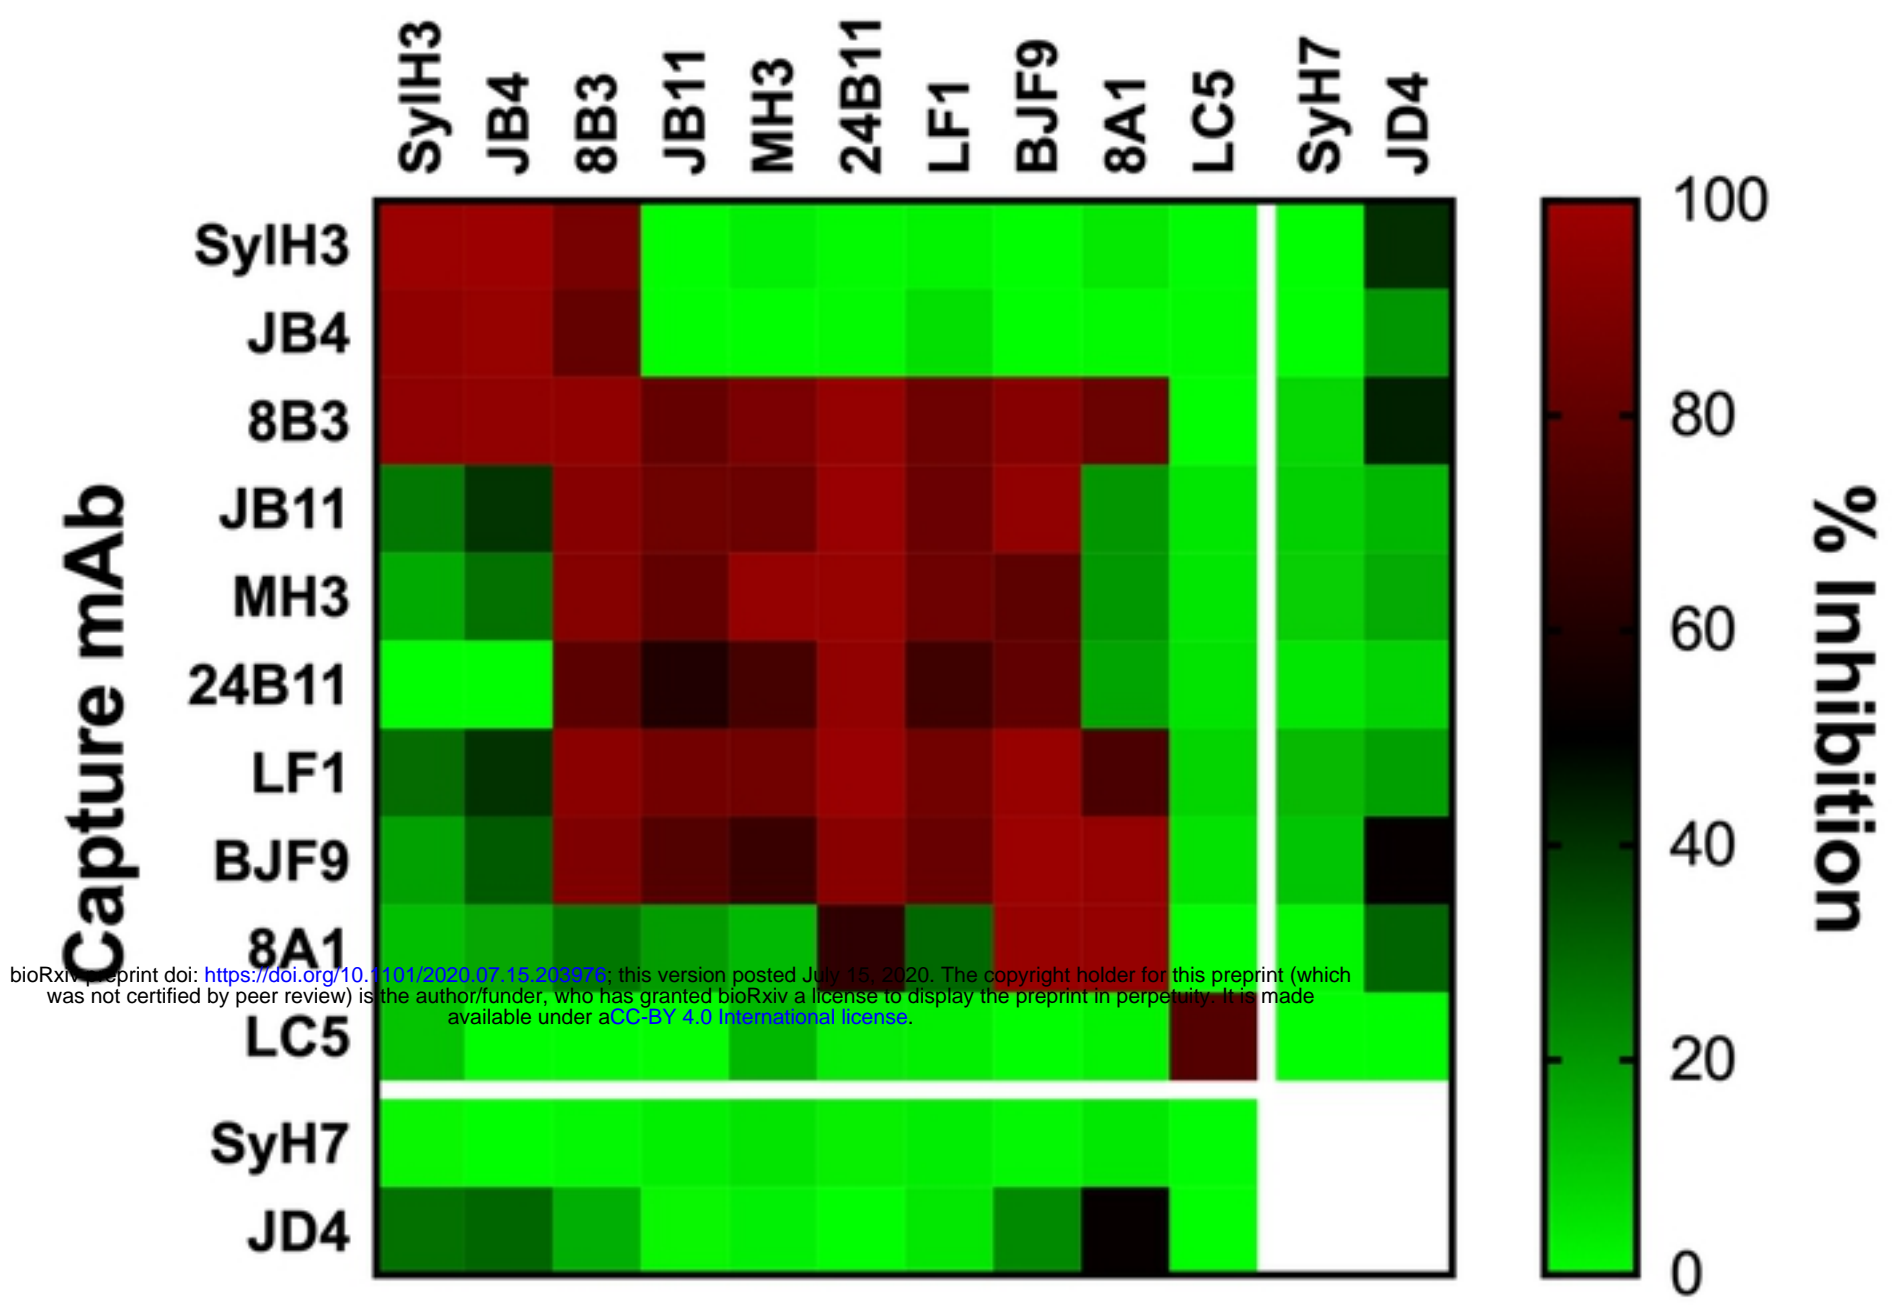

# B.

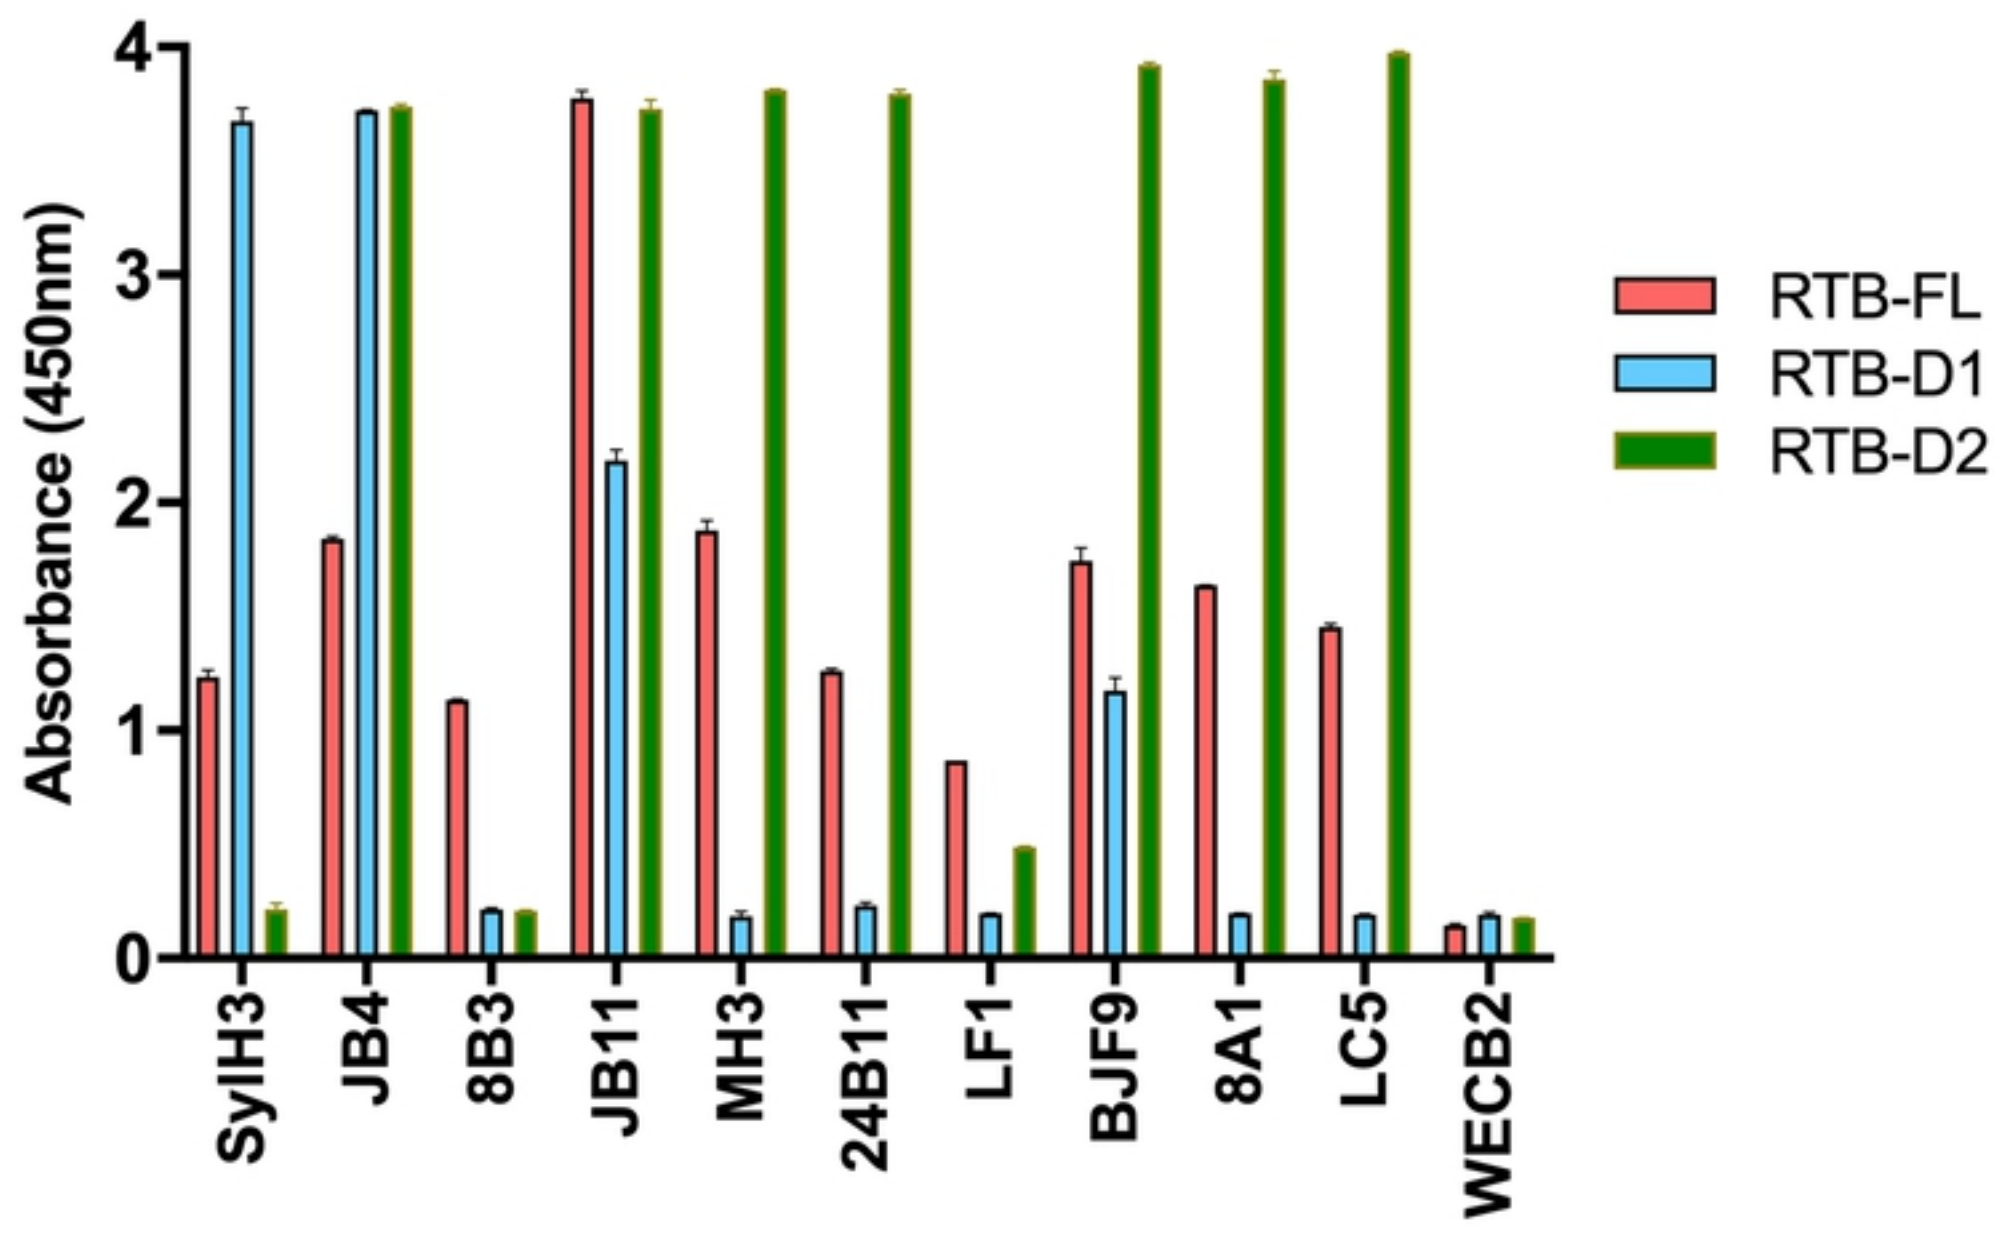

Fig 2

**A**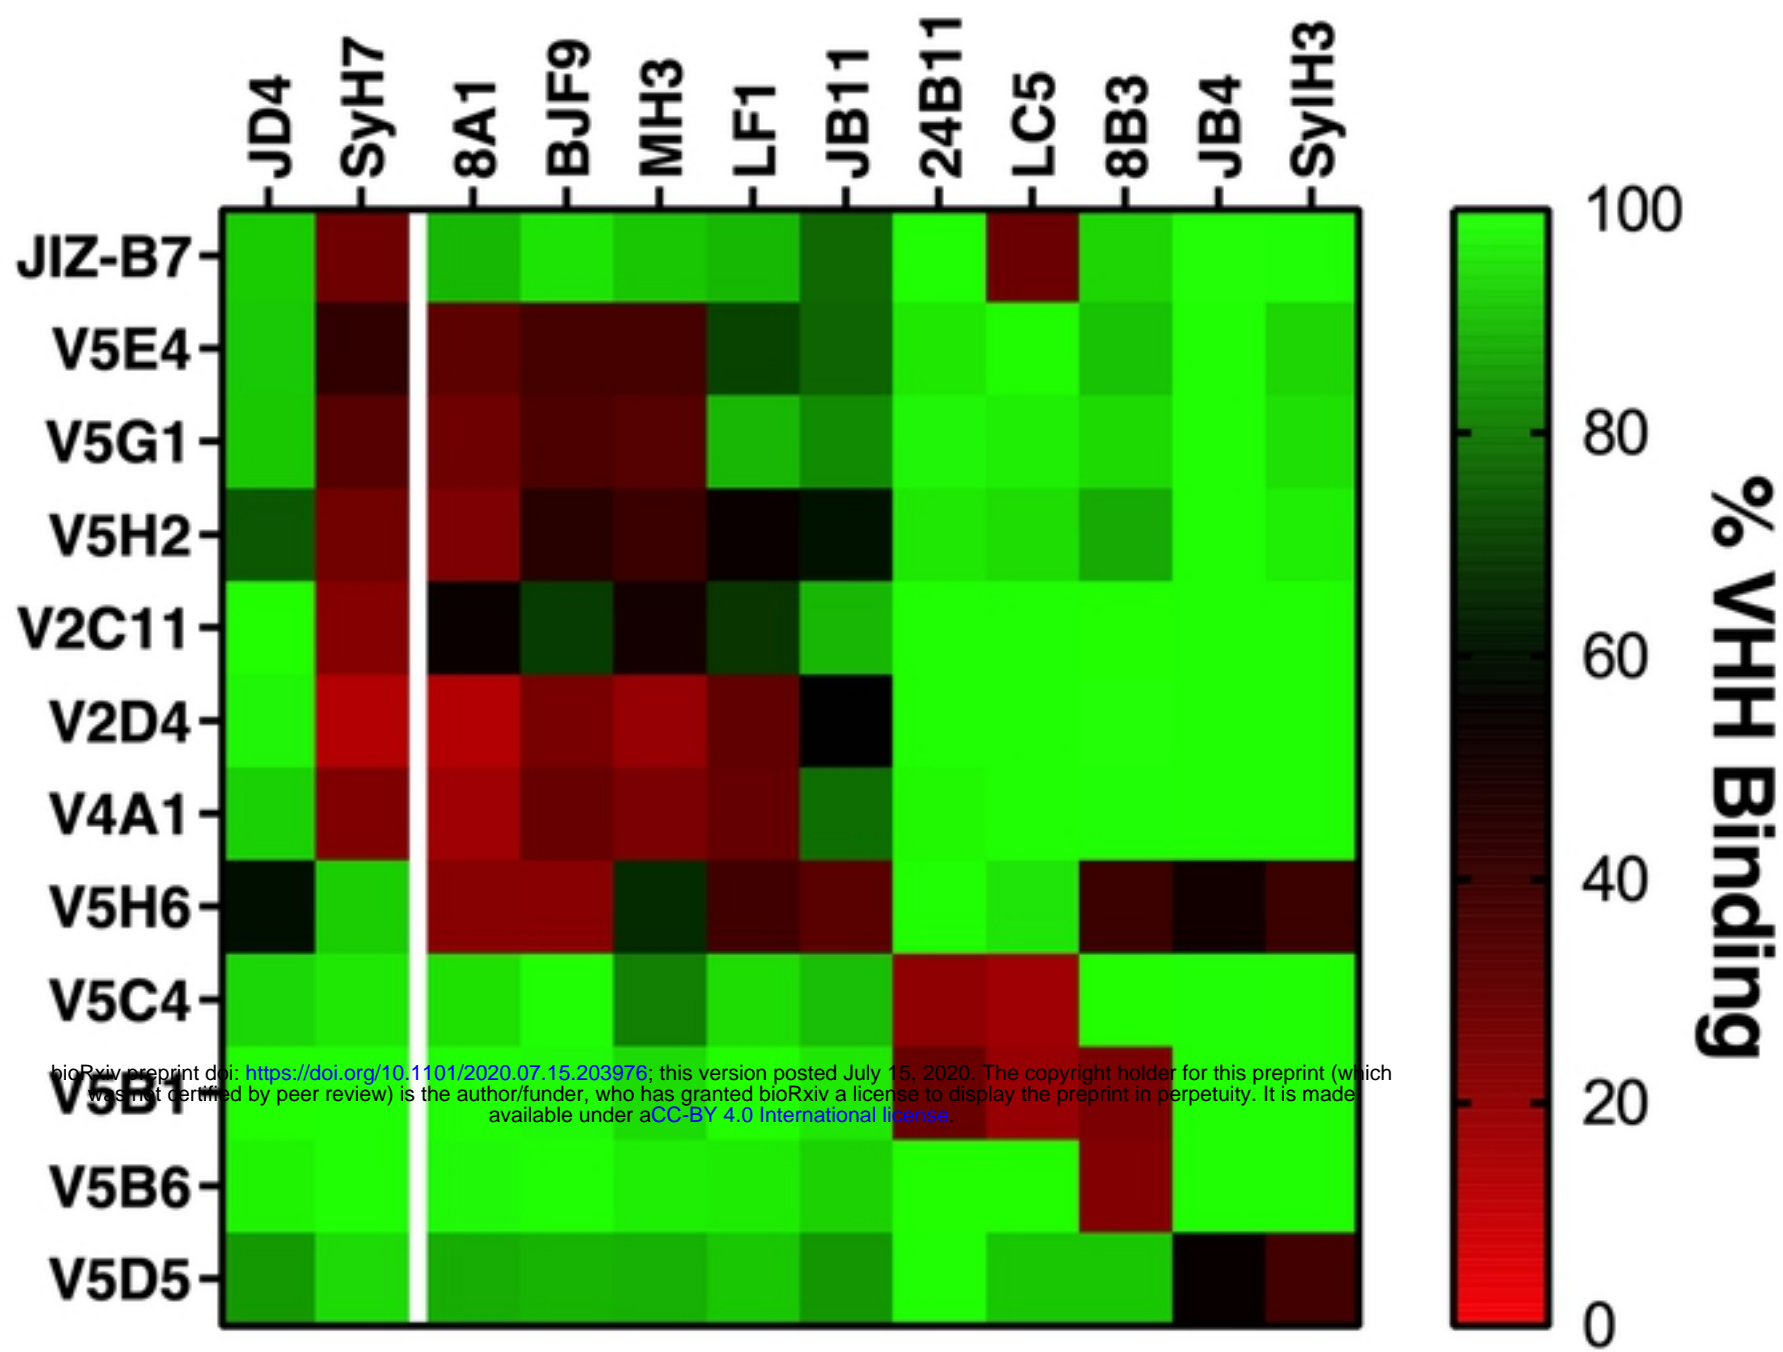

bioRxiv preprint doi: <https://doi.org/10.1101/2020.07.15.203976>; this version posted July 15, 2020. The copyright holder for this preprint (which was not certified by peer review) is the author/funder, who has granted bioRxiv a license to display the preprint in perpetuity. It is made available under aCC-BY 4.0 International license.

**B**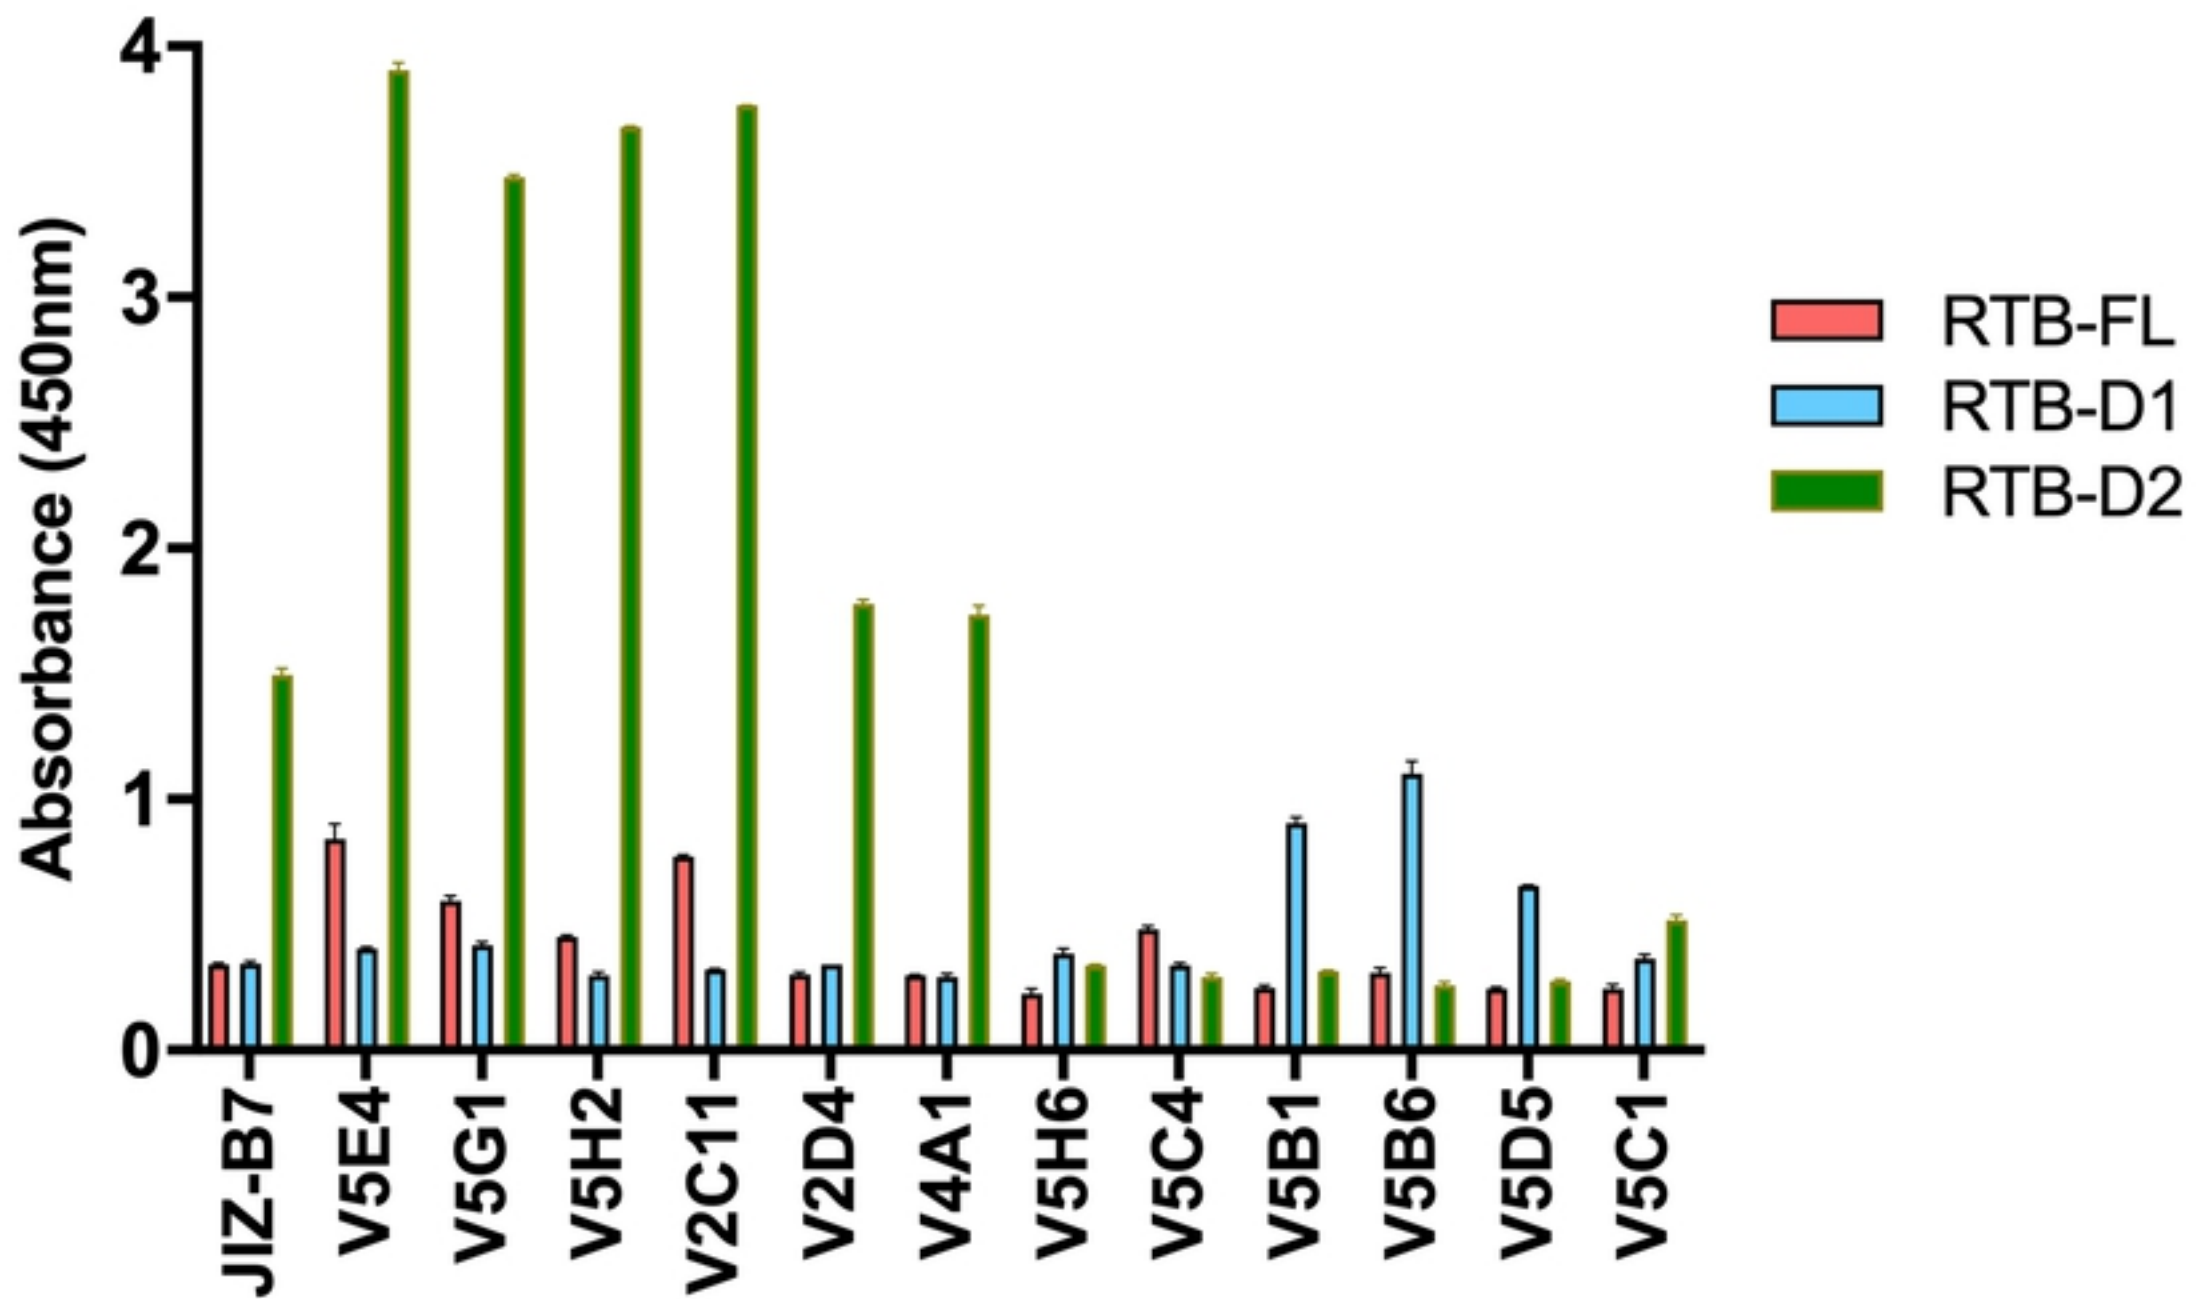

Fig 3

Figure 4

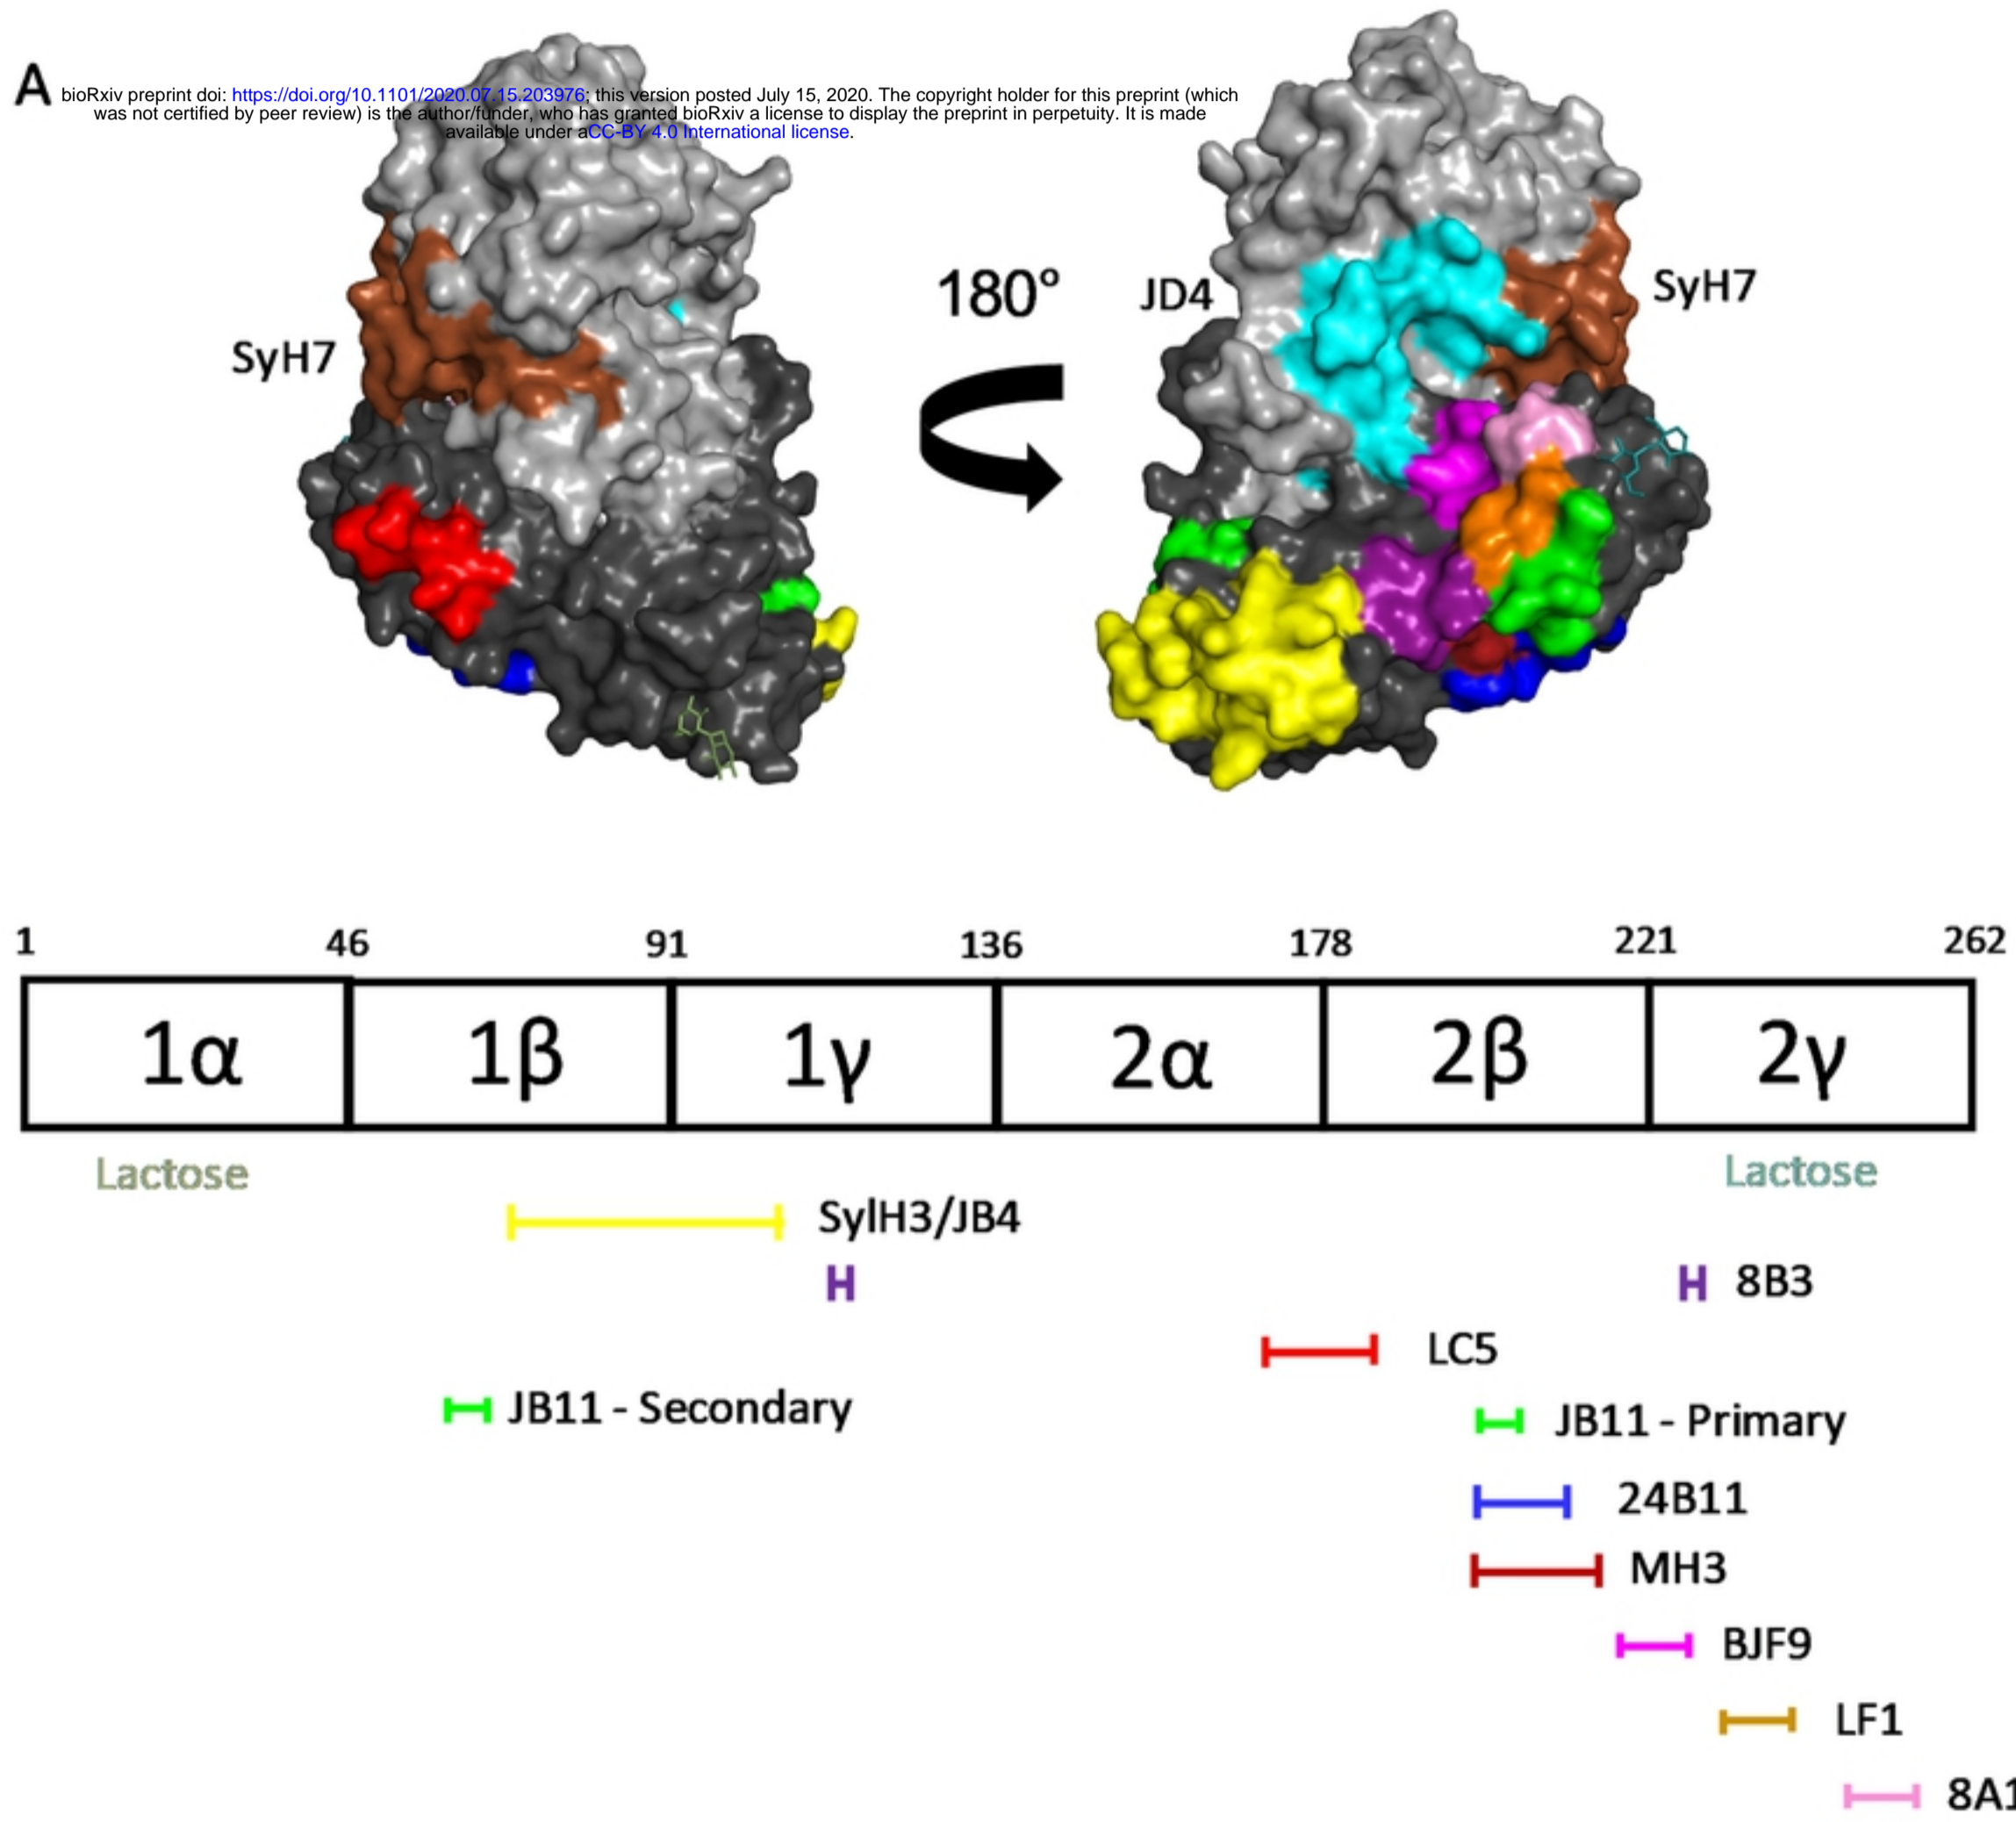

Fig 4
